# Supplementary material
Source: PubMed Central journal article supplement (PMC4933164)
Supplement: 10.1074_M116.718684_jbc.M116.718684-1.pdf [file 10.1074_M116.718684_jbc.M116.718684-1.pdf]

# Gallic Acid is an Antagonist of Semen Amyloid Fibrils that Enhance HIV-1 Infection

Josephine G. LoRiccio<sup>1</sup>, Changmingzi Sherry Xu<sup>1</sup>, Jason Neidleman<sup>2</sup>, Magnus Bergkvist<sup>3</sup>, Warner C. Greene<sup>2</sup>, Nadia R. Roan<sup>2,4\*</sup>, George I. Makhatadze<sup>1\*</sup>

<sup>1</sup> Center for Biotechnology and Interdisciplinary Studies and Department of Biological Sciences, Rensselaer Polytechnic Institute, 110 8<sup>th</sup> Street, Troy, NY 12180, <sup>2</sup> Gladstone Institute of Virology and Immunology, San Francisco, CA 94158, <sup>3</sup> SUNY Polytechnic Institute, Colleges of Nanoscale Science and Engineering, 257 Fuller Road, Albany, NY 12203, <sup>4</sup> Department of Urology, University of California, San Francisco, 94158, USA.

\* Corresponding authors: Nadia Roan [nadia.roan@ucsf.edu](mailto:nadia.roan@ucsf.edu) and George Makhatadze [makhag@rpi.edu](mailto:makhag@rpi.edu).

## SUPPLEMENTAL DATA

**A. SEM1 fibril 0 mM gallic acid**

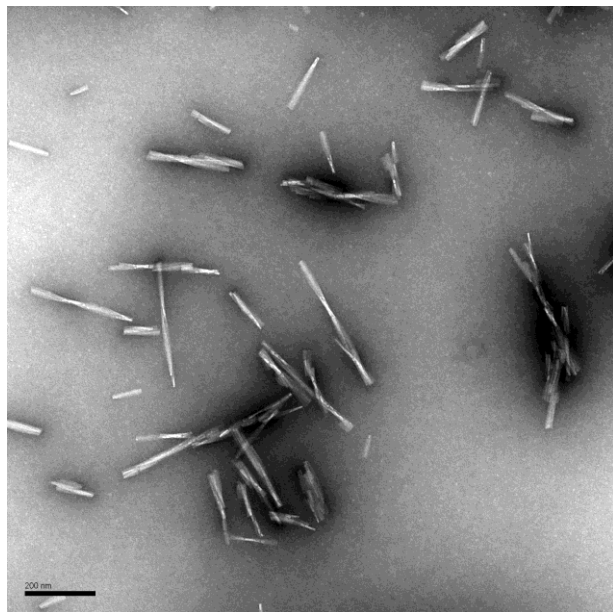

**B. SEM1 fibril 1.0 mM gallic acid**

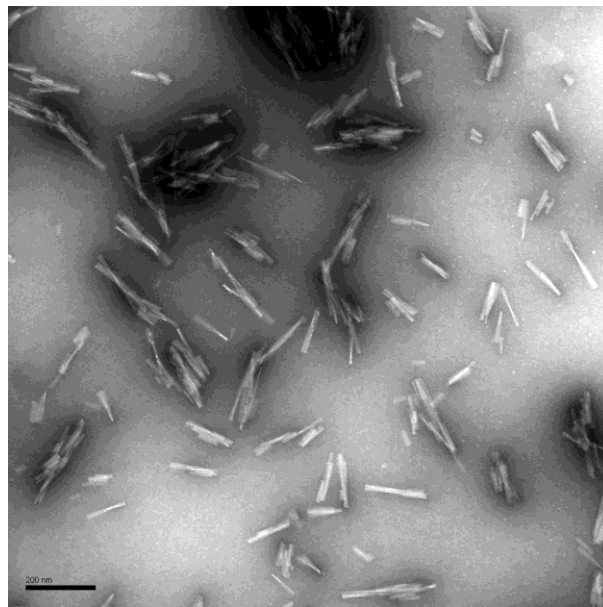

**Supplemental Figure 1:** Images of SEM1 fibrils in the absence (Panel A) or presence of 1.0 mM gallic acid (Panel B). SEM1 fibrils (2.5 mg/ml) were incubated in the absence or presence of 1 mM gallic acid for 24 h at 37°C and then prepared on Parlodion-film carbon-coated grids with 2% potassium phosphotungstate pH 6.5 using the drop method (1). The samples were then imaged at 80 kV in a JEOL 1230 electron microscope (JEOL) using a USC1000 digital camera (Ultrascan), using approaches similar to those previously described (2,3).

## References

1. Hamilton, R. L., Jr., Goerke, J., Guo, L. S., Williams, M. C., and Havel, R. J. (1980) Unilamellar liposomes made with the French pressure cell: a simple preparative and semiquantitative technique. *J Lipid Res* **21**, 981-992
2. Roan, N. R., Munch, J., Arhel, N., Mothes, W., Neidleman, J., Kobayashi, A., Smith-McCune, K., Kirchhoff, F., and Greene, W. C. (2009) The cationic properties of SEVI underlie its ability to enhance human immunodeficiency virus infection. *J Virol* **83**, 73-80
3. Roan, N. R., Sowinski, S., Munch, J., Kirchhoff, F., and Greene, W. C. (2010) Aminoquinoline surfen inhibits the action of SEVI (semen-derived enhancer of viral infection). *J Biol Chem* **285**, 1861-1869
